# Supplementary material
Source: Royal Society of Chemistry journal article supplement (doi:10.1039/d6cp00410e)
Supplement: d6cp00410e1.pdf [file d6cp00410e1.pdf]

## Supporting information

# Mechanistic Insights into Mixed-Solvent-Induced Swelling of Amine-Cured Epoxy Networks: A Combined MD and DFT Study

Jiaying Xu<sup>1</sup>, Aiqin Huang<sup>1</sup>, Yan Zhang<sup>1</sup>, Changwei Hu<sup>1</sup>, Shimei Xu<sup>2\*</sup>, and Zhishan Su<sup>1\*</sup>

<sup>1</sup>Key Laboratory of Green Chemistry and Technology, Ministry of Education, National and Local Joint Engineering Laboratory of Energy Plant Biofuel Preparation and Utilization, College of Chemistry, Sichuan University, Chengdu, Sichuan 610064, P. R. China

<sup>2</sup>The Collaborative Innovation Center for Eco-Friendly and Fire-Safety Polymeric Materials (MoE), National Engineering Laboratory of Eco-Friendly Polymeric Materials (Sichuan), College of Chemistry, Sichuan University, Chengdu 610064, China.

\*Email: [xushimei@scu.edu.cn](mailto:xushimei@scu.edu.cn), [suzhishan@scu.edu.cn](mailto:suzhishan@scu.edu.cn)

## Contents

|                                                                                                                                                                                                                                                                                                                                                                                            |   |
|--------------------------------------------------------------------------------------------------------------------------------------------------------------------------------------------------------------------------------------------------------------------------------------------------------------------------------------------------------------------------------------------|---|
| Figure S1 Flowchart of conformational search.....                                                                                                                                                                                                                                                                                                                                          | 2 |
| Figure S2 THF and H <sub>2</sub> O occupancies in the first solvation shell of ether, amino, and hydroxyl groups, obtained by RDF analysis. ....                                                                                                                                                                                                                                           | 2 |
| Figure S3 Final simulated configurations of the DGEBA-DDM in the THF/H <sub>2</sub> O mixture and the value of averaged SASA (nm <sup>2</sup> ). ....                                                                                                                                                                                                                                      | 3 |
| Figure S4 Final simulated configurations of the DGEBA-PACM in the THF/H <sub>2</sub> O mixture and the value of averaged SASA (nm <sup>2</sup> ). ....                                                                                                                                                                                                                                     | 4 |
| Figure S5 Final simulated configurations of the DGEBA-MPDA in the THF/H <sub>2</sub> O mixture and the value of averaged SASA (nm <sup>2</sup> ). ....                                                                                                                                                                                                                                     | 5 |
| Figure S6 (a) Optimized geometry of a cross-linked cluster (2 DGEBA / 1 MPDA). (b) Visualizing non-covalent interactions analysis by RDG. ....                                                                                                                                                                                                                                             | 6 |
| Figure S7 Weak interactions between THF and polymers: (a) DGEBA-DDM; (b) DGEBA-PACM; (c) DGEBA-MPDA. ....                                                                                                                                                                                                                                                                                  | 6 |
| Figure S8 Radial distribution function (RDF) curves for selected atoms in different organic solvents and H <sub>2</sub> O.....                                                                                                                                                                                                                                                             | 6 |
| Table S1 Atomic charge and the corresponding contribution to dispersion energy obtained at B3LYP/def2-TZVP.....                                                                                                                                                                                                                                                                            | 7 |
| Table S2 Comparison of dipole moments ( $\mu$ , Debye), calculated molecular vdW volumes ( $V$ , Å <sup>3</sup> ), total dispersion energy ( $E_{\text{disp}}$ , kcal/mol), and total H <sub>2</sub> O–organic solvent interaction energies ( $E_{\text{total}}$ , kJ/mol) for the investigated organic solvents. ....                                                                     | 8 |
| Figure S9 Dispersion energies ( $E_{\text{disp}}$ ) and dispersion density visualizations highlighting atomic contributions to dispersion interactions in CH <sub>3</sub> CN, DMF, THF, and DCM, obtained by Multiwfn 3.8 (dev) software analysis (isovalue surface = -0.05). Visualizations of aRDG analysis and thermal fluctuation index between organic solvents as well as water..... | 8 |
| Figure S10 Comparison of the solvent-accessible surface area (SASA) of the DGEBA–DDM                                                                                                                                                                                                                                                                                                       |   |

|                                                                                                                                                                                                |    |
|------------------------------------------------------------------------------------------------------------------------------------------------------------------------------------------------|----|
| polymer in different pure and mixed solvents: (a) mixed solvents with molar ratio of 2:8; (b) mixed solvents with volume ratio of 1:1.....                                                     | 9  |
| Figure S11 Final simulated configurations of the DGEBA-DDM in pure organic solvents and the value of averaged SASA (nm <sup>2</sup> ).....                                                     | 9  |
| Table S3 Electronic energies ( $E_e$ ), enthalpies ( $H$ ) and Gibbs free energies ( $G$ ) for all stationary points (in Hartree), obtained at the B3LYP-D3(BJ)/6-31G* theoretical level. .... | 9  |
| Cartesian coordinates of all structures. ....                                                                                                                                                  | 10 |

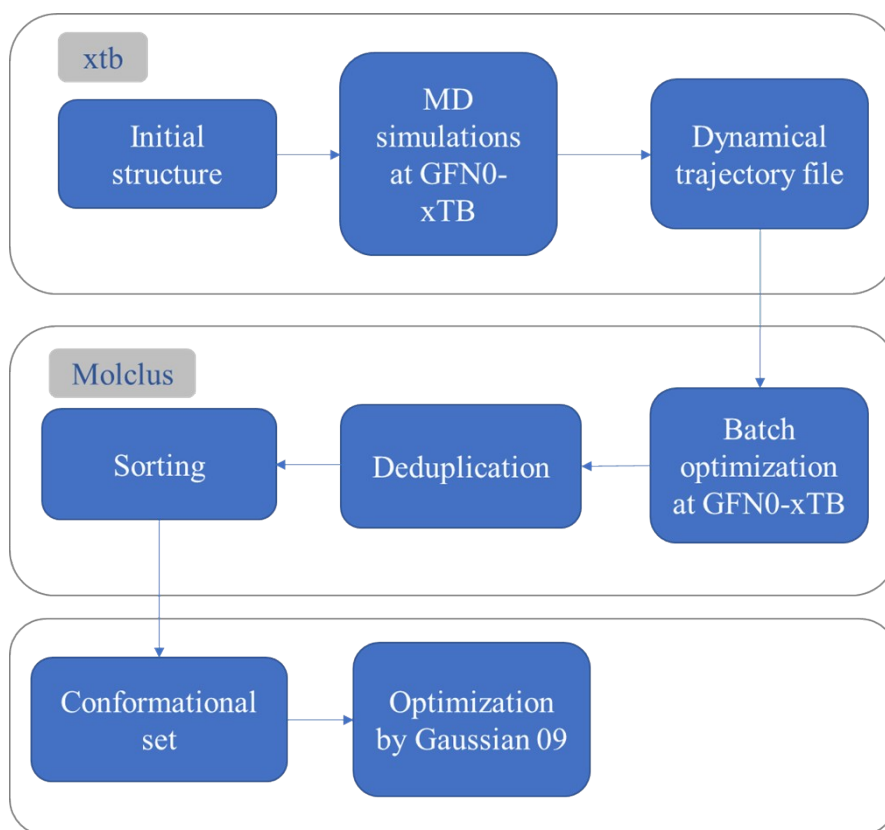

**Figure S1** Flowchart of conformational search.

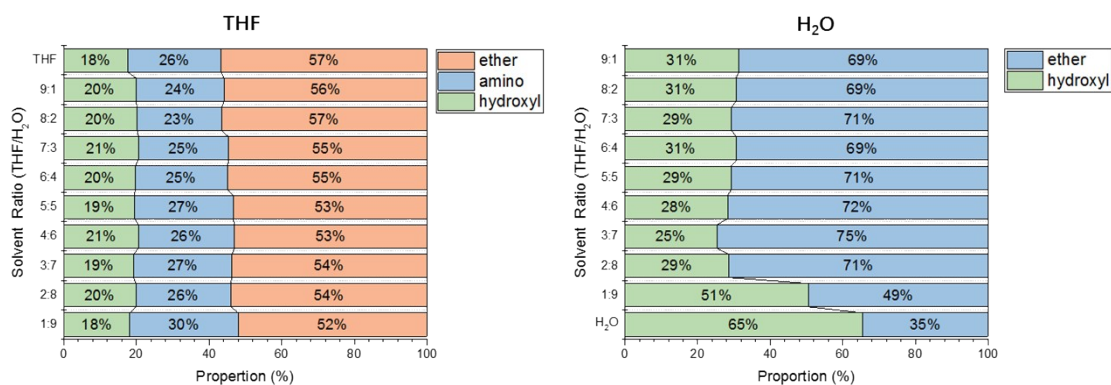

**Figure S2** THF and H<sub>2</sub>O occupancies in the first solvation shell of ether, amino, and hydroxyl groups, obtained by RDF analysis.

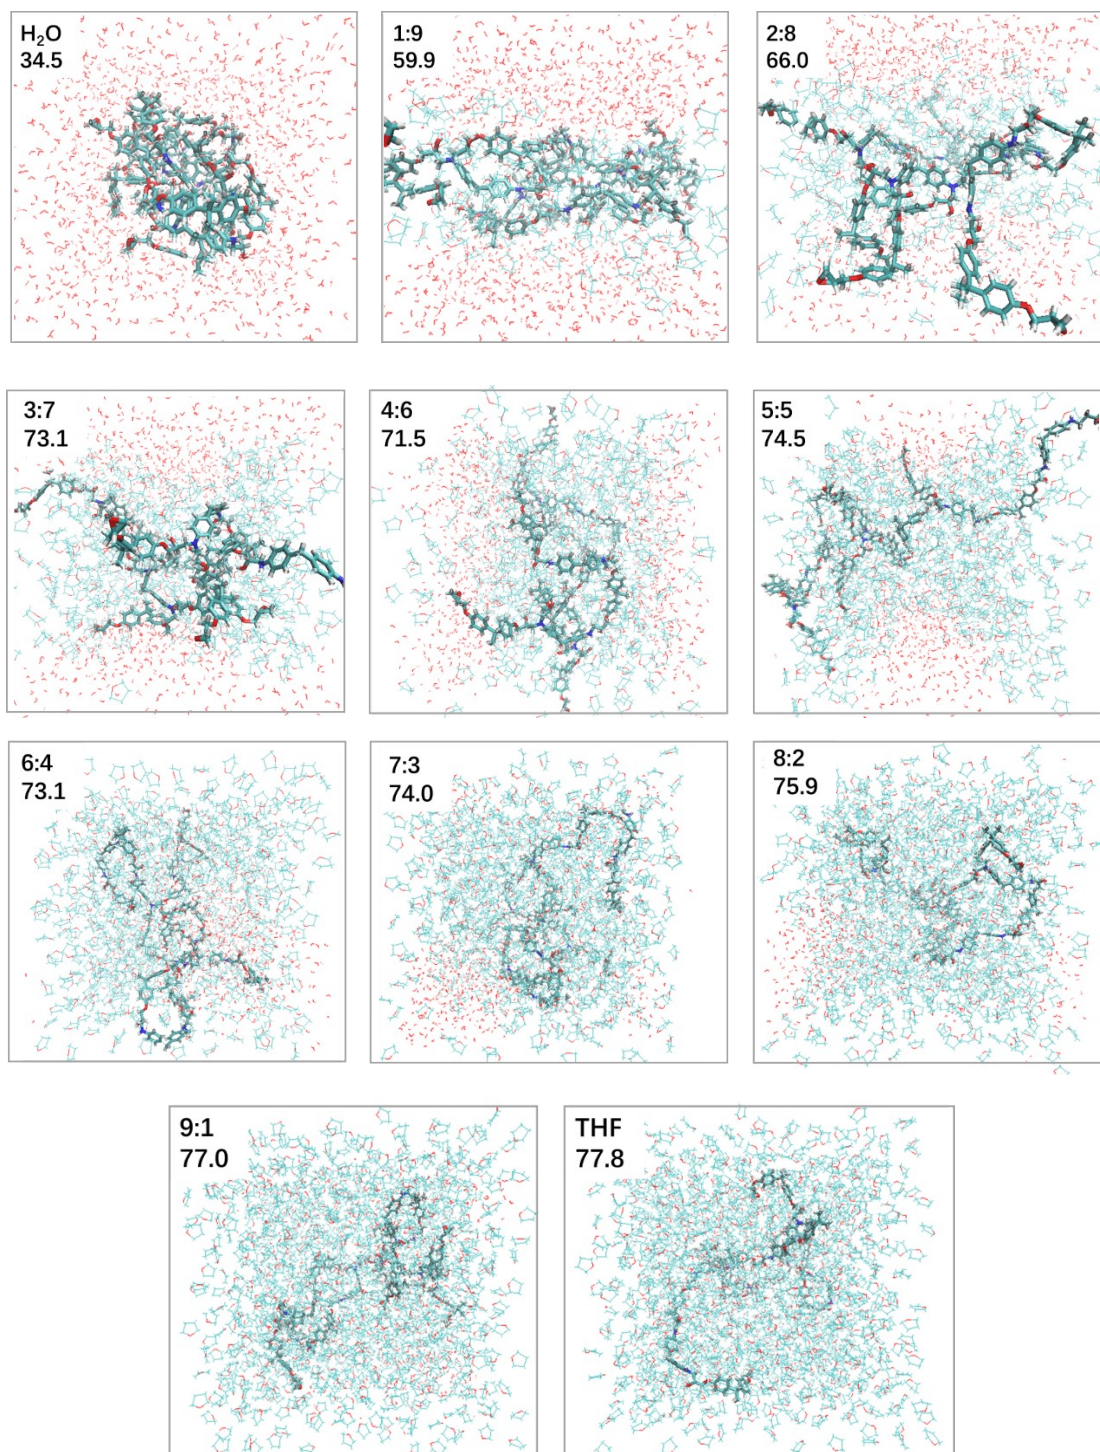

**Figure S3** Final simulated configurations of the DGEBA-DDM in the THF/H<sub>2</sub>O mixture and the value of averaged SASA (nm<sup>2</sup>).

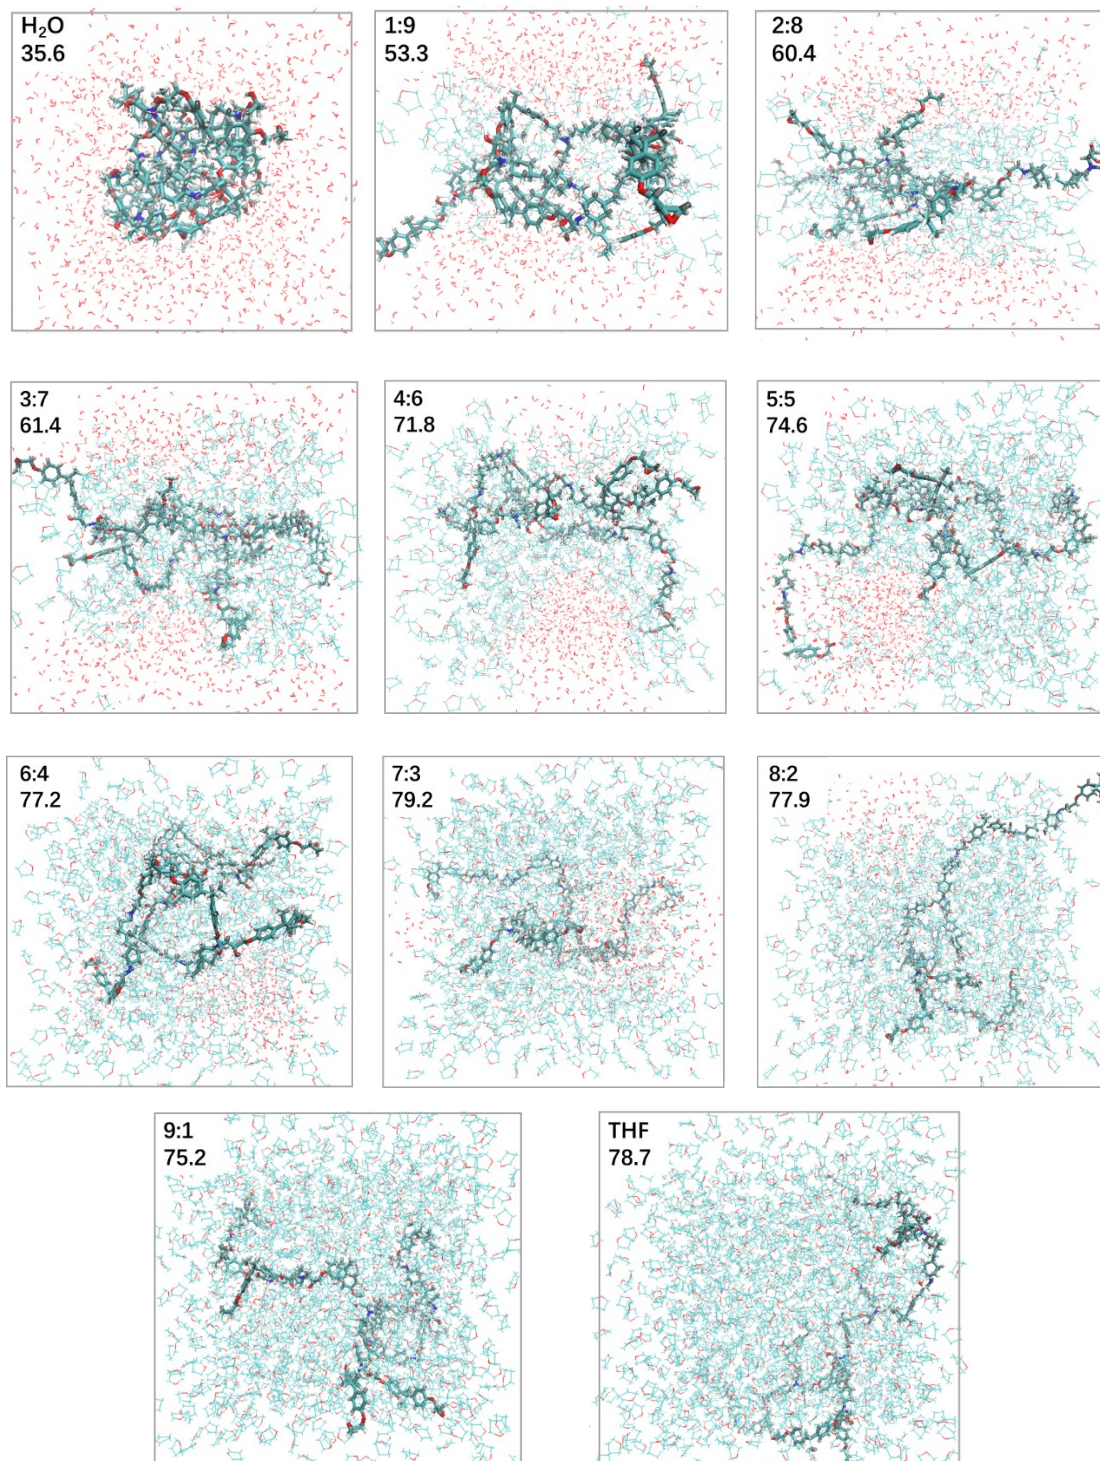

**Figure S4** Final simulated configurations of the DGEBA-PACM in the THF/H<sub>2</sub>O mixture and the value of averaged SASA (nm<sup>2</sup>).

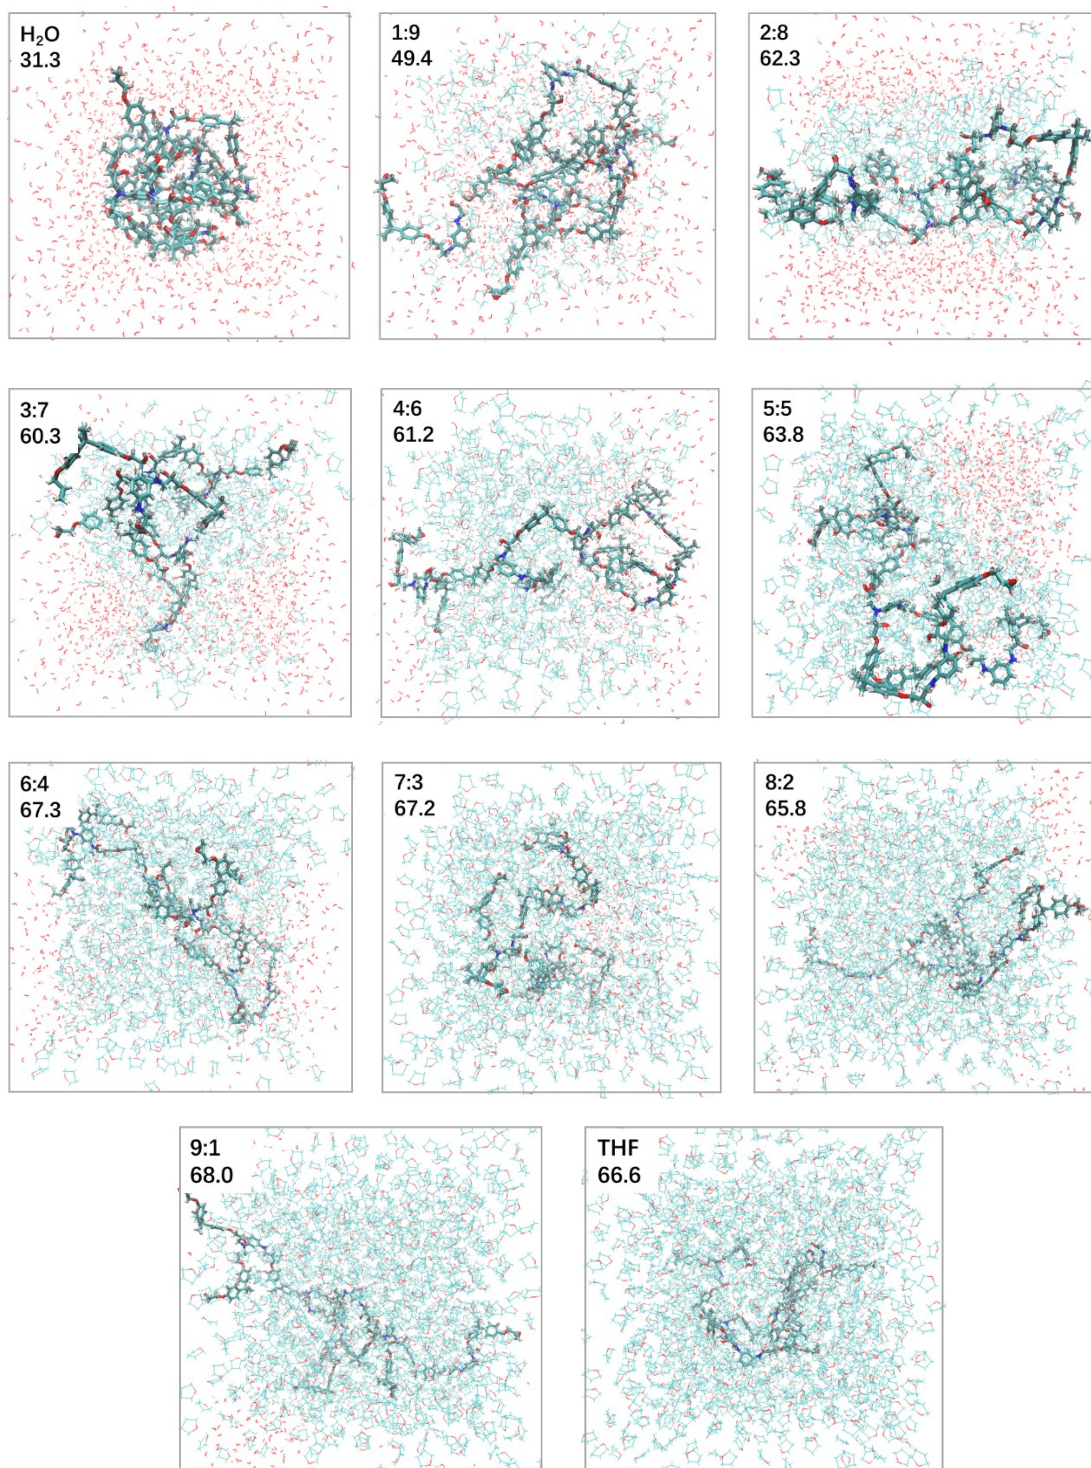

**Figure S5** Final simulated configurations of the DGEBA-MPDA in the THF/H<sub>2</sub>O mixture and the value of averaged SASA (nm<sup>2</sup>).

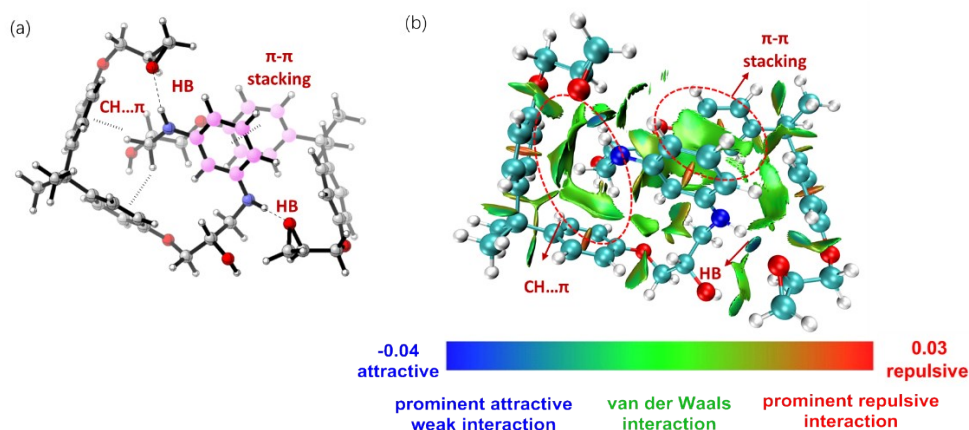

**Figure S6** (a) Optimized geometry of a cross-linked cluster (2 DGEBA / 1 MPDA). (b) Visualizing non-covalent interactions analysis by RDG.

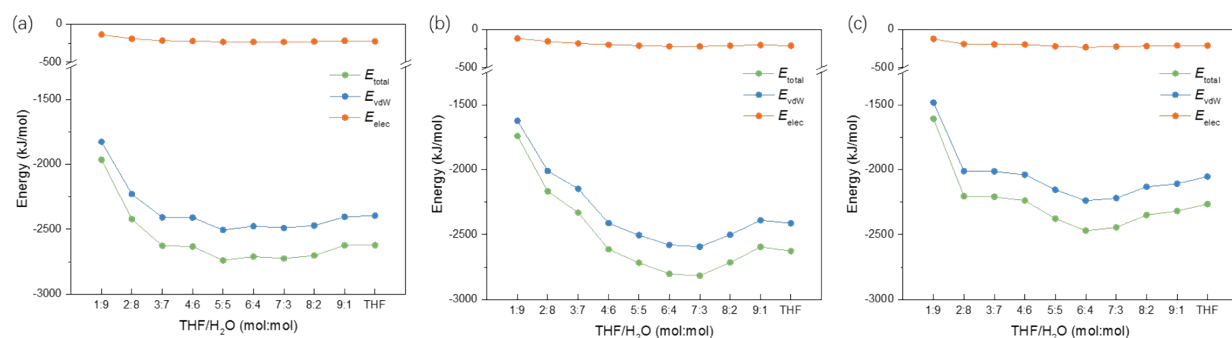

**Figure S7** Weak interactions between THF and polymers: (a) DGEBA-DDM; (b) DGEBA-PACM; (c) DGEBA-MPDA.

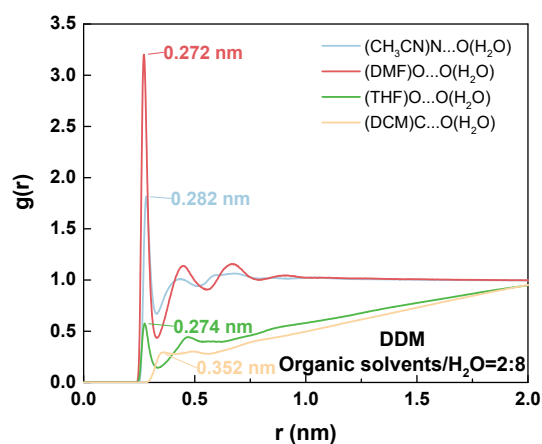

**Figure S8** Radial distribution function (RDF) curves for selected atoms in different organic solvents and H<sub>2</sub>O.

**Table S1** Atomic charge, total dispersion energy and the corresponding contribution to dispersion energy obtained at B3LYP/def2-TZVP level of theory.

| Organic solvent                                                                                           | Atomic Number | Charge | Atomic contribution to dispersion energy | Total dispersion energy |
|-----------------------------------------------------------------------------------------------------------|---------------|--------|------------------------------------------|-------------------------|
| 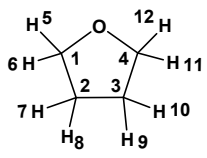<br>THF                  | O             | -0.491 | -0.941                                   | -9.689                  |
|                                                                                                           | C1            | -0.075 | -1.161                                   |                         |
|                                                                                                           | C2            | -0.423 | -1.209                                   |                         |
|                                                                                                           | C3            | -0.423 | -1.209                                   |                         |
|                                                                                                           | C4            | -0.075 | -1.161                                   |                         |
|                                                                                                           | H5            | 0.149  | -0.521                                   |                         |
|                                                                                                           | H6            | 0.187  | -0.452                                   |                         |
|                                                                                                           | H7            | 0.204  | -0.513                                   |                         |
|                                                                                                           | H8            | 0.203  | -0.519                                   |                         |
|                                                                                                           | H9            | 0.203  | -0.519                                   |                         |
|                                                                                                           | H10           | 0.204  | -0.513                                   |                         |
|                                                                                                           | H11           | 0.187  | -0.452                                   |                         |
| H12                                                                                                       | 0.149         | -0.521 |                                          |                         |
| <br>DCM                 | C             | -0.379 | -0.833                                   | -4.130                  |
|                                                                                                           | H1            | 0.217  | -0.452                                   |                         |
|                                                                                                           | H2            | 0.217  | -0.452                                   |                         |
|                                                                                                           | C3            | -0.027 | -1.197                                   |                         |
| C4                                                                                                        | -0.027        | -1.197 |                                          |                         |
| <br>DMF                | O             | -0.610 | -0.729                                   | -8.599                  |
|                                                                                                           | N             | -0.399 | -1.233                                   |                         |
|                                                                                                           | C1            | 0.507  | -1.241                                   |                         |
|                                                                                                           | C2            | -0.412 | -1.086                                   |                         |
|                                                                                                           | C3            | -0.390 | -1.062                                   |                         |
|                                                                                                           | H4            | 0.100  | -0.464                                   |                         |
|                                                                                                           | H5            | 0.240  | -0.480                                   |                         |
|                                                                                                           | H6            | 0.190  | -0.464                                   |                         |
|                                                                                                           | H7            | 0.190  | -0.464                                   |                         |
|                                                                                                           | H8            | 0.189  | -0.459                                   |                         |
| H9                                                                                                        | 0.189         | -0.459 |                                          |                         |
| H10                                                                                                       | 0.206         | -0.457 |                                          |                         |
| <br>CH <sub>3</sub> CN | N             | -0.323 | -0.584                                   | -2.995                  |
|                                                                                                           | C1            | 0.278  | -0.779                                   |                         |
|                                                                                                           | C2            | -0.701 | -0.644                                   |                         |
|                                                                                                           | H3            | 0.249  | -0.329                                   |                         |
|                                                                                                           | H4            | 0.249  | -0.329                                   |                         |
| H5                                                                                                        | 0.249         | -0.329 |                                          |                         |

To decouple the competitive interactions between water and organic solvents that ultimately

govern solvent–polymer affinity and swelling behavior, a simplified solvent model containing one organic solvent molecule and 1000 water molecules was constructed. Molecular dynamics simulations were performed for 1 ns under NVT conditions. Weak interactions between organic solvent and water were shown in Table S2. The visualization of averaged RDG (aRDG) and their stability (analyzed by thermal fluctuation index) during 1ns at 298K were shown in Figure S9.

**Table S2** Comparison of dipole moments ( $\mu$ , Debye), calculated molecular vdW volumes ( $V$ , Å<sup>3</sup>), total dispersion energy ( $E_{\text{disp}}$ , kcal/mol), obtained by multiwfn 3.8 (dev) software, for the investigated organic solvents. Electrostatic interaction energy ( $E_{\text{elec}}$ ), Van der Waals interaction energy ( $E_{\text{vdW}}$ ) and total H<sub>2</sub>O–organic solvent interaction energies ( $E_{\text{total}}$ , kJ/mol) were obtained by GROMACS 2018.8 package.

| Organic solvent    | <sup>a</sup> $E_{\text{elec}}$ | <sup>b</sup> $E_{\text{vdW}}$ | $E_{\text{total}}$ | $\mu$ | <sup>c</sup> $E_{\text{disp}}$ | $V$ |
|--------------------|--------------------------------|-------------------------------|--------------------|-------|--------------------------------|-----|
| CH <sub>3</sub> CN | -46.0                          | -23.7                         | -69.7              | 3.92  | -3.0                           | 66  |
| DMF                | -58.9                          | -37.8                         | -96.7              | 3.82  | -8.6                           | 107 |
| THF                | -26.4                          | -40.8                         | -67.1              | 1.75  | -9.7                           | 107 |
| DCM                | -14.2                          | -30.0                         | -44.2              | 1.60  | -4.1                           | 85  |

<sup>a</sup> Electrostatic interaction energy between H<sub>2</sub>O–organic solvent;

<sup>b</sup> Van der Waals interaction energy between H<sub>2</sub>O–organic solvent;

<sup>c</sup> Total dispersion energy.

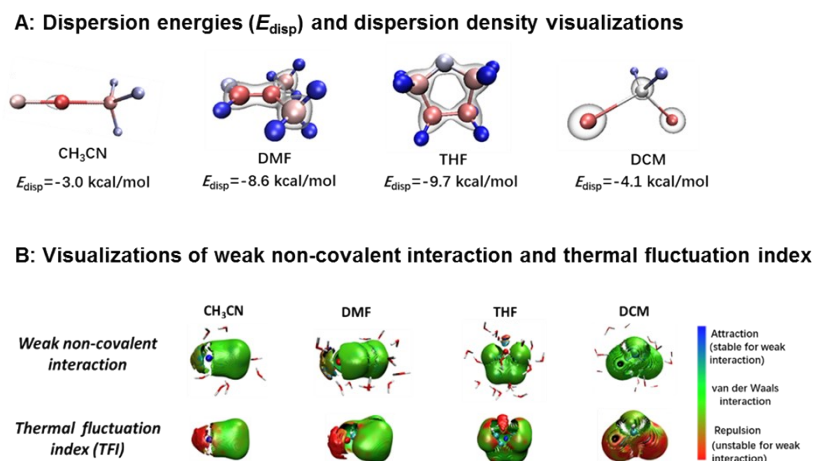

**Figure S9** Dispersion energies ( $E_{\text{disp}}$ ) and dispersion density visualizations highlighting atomic contributions to dispersion interactions in CH<sub>3</sub>CN, DMF, THF, and DCM, obtained by Multiwfn 3.8 (dev) software analysis (isovalue surface = -0.05). Visualizations of aRDG analysis and thermal fluctuation index between organic solvents as well as water.

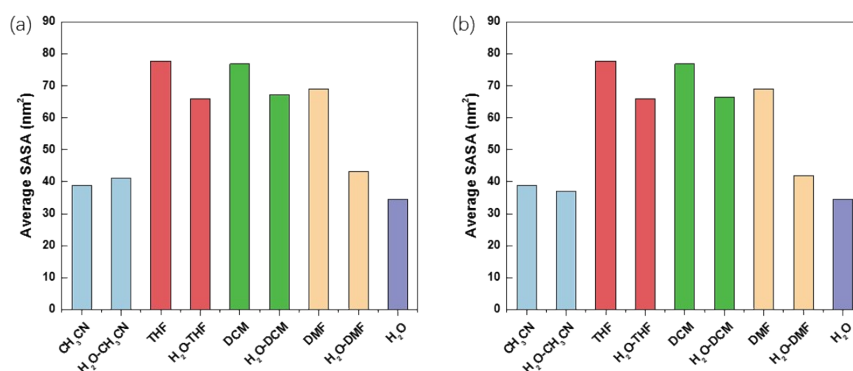

**Figure S10** Comparison of the solvent-accessible surface area (SASA) of the DGEBA-DDM polymer in different pure and mixed solvents: (a) mixed solvents with molar ratio of 2:8; (b) mixed solvents with volume ratio of 1:1.

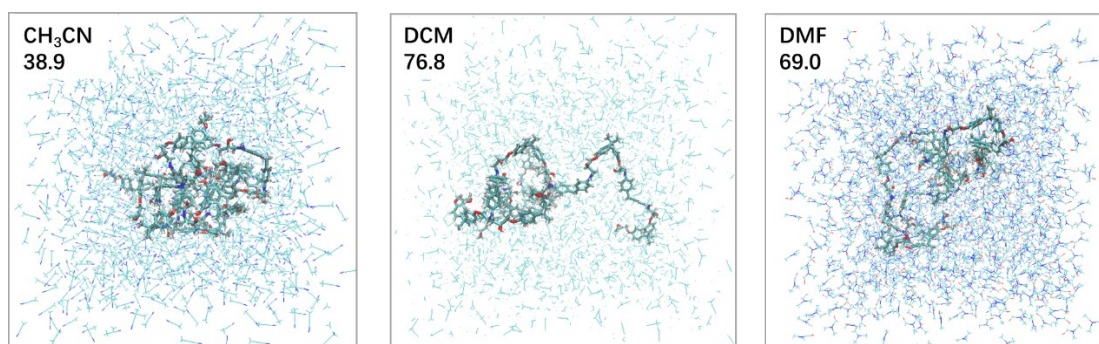

**Figure S11** Final simulated configurations of the DGEBA-DDM in pure organic solvents and the value of averaged SASA (nm<sup>2</sup>).

**Table S3** Electronic energies ( $E_e$ ), enthalpies ( $H$ ) and Gibbs free energies ( $G$ ) for all stationary points (in Hartree), obtained at the B3LYP-D3(BJ)/6-31G\* theoretical level.

| Structures                  | <sup>a</sup> ZPE | $E_e$       | <sup>b</sup> $H_{\text{corr}}$ | $H$         | <sup>c</sup> $G_{\text{corr}}$ | $G$         |
|-----------------------------|------------------|-------------|--------------------------------|-------------|--------------------------------|-------------|
| THF                         | 0.11745          | -232.34747  | 0.12335                        | -232.34157  | 0.08872                        | -232.37620  |
| H <sub>2</sub> O            | 0.02117          | -76.38836   | 0.02495                        | -76.38458   | 0.00351                        | -76.40602   |
| DDMa                        | 0.66019          | -1728.36019 | 0.69783                        | -1728.32255 | 0.58867                        | -1728.43171 |
| DDMa-2THF-8H <sub>2</sub> O | 1.10960          | -2804.40326 | 1.17800                        | -2804.33487 | 1.00410                        | -2804.50876 |
| 2DGEBA /1MPDA               | 0.96697          | -2573.28952 | 1.02112                        | -2573.23537 | 0.88152                        | -2573.37497 |

<sup>a</sup> Zero-point correction energy;

<sup>b</sup> Thermal correction to enthalpy obtained at the B3LYP-D3(BJ)/6-31G\* level of theory;

<sup>c</sup> Thermal correction to Gibbs free energy obtained at the B3LYP-D3(BJ)/6-31G\* level of theory.

### Cartesian coordinates of all structures.

|                       |             |             |             |   |             |             |             |
|-----------------------|-------------|-------------|-------------|---|-------------|-------------|-------------|
| <b>THF</b>            |             |             |             | H | -4.06311900 | -0.31747800 | 2.55036600  |
| C                     | -0.05145200 | -0.46012800 | 1.16808100  | N | -5.60266500 | -1.57766000 | 0.81316200  |
| O                     | 0.09801800  | -1.27427200 | 0.00058100  | H | -5.89939500 | -0.73504600 | 1.29206600  |
| C                     | 0.26022900  | -0.44509100 | -1.15447700 | N | 3.53234100  | -1.30381300 | -2.45421800 |
| C                     | -0.10343400 | 0.97885400  | -0.71955600 | H | 4.46773500  | -1.66478100 | -2.28779500 |
| C                     | 0.32742500  | 0.96596700  | 0.75320800  | H | 3.56923100  | -0.30528200 | -2.62688800 |
| H                     | -1.09541700 | -0.50520300 | 1.51458700  | C | -6.18847500 | -1.68767700 | -0.51271600 |
| H                     | 0.58740200  | -0.86302800 | 1.96224100  | H | -5.76522100 | -2.55254400 | -1.02693300 |
| H                     | 1.30458600  | -0.49678600 | -1.49902100 | H | -7.26276200 | -1.87974000 | -0.41781000 |
| H                     | -0.38098000 | -0.82927300 | -1.95594400 | C | -5.99972900 | -0.46315600 | -1.42393500 |
| H                     | 0.39783600  | 1.74668200  | -1.31638300 | H | -6.62387300 | 0.36580200  | -1.05267500 |
| H                     | -1.18544600 | 1.13790400  | -0.79721700 | C | -4.55994900 | 0.05758500  | -1.48982400 |
| H                     | 1.41106400  | 1.11243000  | 0.83293900  | H | -3.84032900 | -0.76902100 | -1.52153900 |
| H                     | -0.16556000 | 1.73049400  | 1.36106000  | H | -4.43489600 | 0.66043900  | -2.40231000 |
| <b>H<sub>2</sub>O</b> |             |             |             | O | -4.34928600 | 0.87090200  | -0.34258600 |
| O                     | -0.01712000 | -0.05623400 | 0.00000000  | C | -3.14138700 | 1.49247100  | -0.19774600 |
| H                     | 0.95021400  | -0.00693300 | 0.00000000  | C | -2.06880400 | 1.36069400  | -1.08582500 |
| H                     | -0.29354900 | 0.87207200  | 0.00000000  | C | -3.00767800 | 2.32191800  | 0.91893900  |
| <b>DDMa</b>           |             |             |             | C | -0.90118800 | 2.08918900  | -0.86134500 |
| C                     | -0.04102900 | -2.62817600 | 1.85341100  | H | -2.12856000 | 0.69939900  | -1.94186900 |
| H                     | 0.27369600  | -2.03214500 | 2.72223400  | C | -1.83350400 | 3.04006400  | 1.12462100  |
| H                     | 0.10830900  | -3.67733300 | 2.14216100  | H | -3.84180000 | 2.40352100  | 1.60861700  |
| C                     | 0.85636500  | -2.31769400 | 0.66872700  | C | -0.75810900 | 2.95217300  | 0.23116700  |
| C                     | 1.92471700  | -3.15376500 | 0.32987600  | H | -0.07687600 | 1.98000300  | -1.56002300 |
| C                     | 0.66696800  | -1.16152000 | -0.09927400 | H | -1.77006000 | 3.68458000  | 1.99408900  |
| C                     | 2.80080800  | -2.83370400 | -0.70612300 | C | 0.51098000  | 3.81105600  | 0.35214300  |
| H                     | 2.08189200  | -4.07277400 | 0.89174000  | C | 0.44286400  | 4.89020100  | -0.75066900 |
| C                     | 1.53454200  | -0.82973000 | -1.13175300 | H | 0.40476300  | 4.44744700  | -1.75058200 |
| H                     | -0.16381000 | -0.49939100 | 0.12513500  | H | -0.46522400 | 5.48657000  | -0.61868900 |
| C                     | 2.63669000  | -1.64472800 | -1.43798700 | H | 1.30435000  | 5.56607400  | -0.70167900 |
| H                     | 3.62499800  | -3.49675500 | -0.95385700 | C | 0.59926800  | 4.54430000  | 1.70781500  |
| H                     | 1.38838000  | 0.09482200  | -1.68380700 | H | -0.22150700 | 5.25975600  | 1.82878500  |
| C                     | -1.50759500 | -2.36545000 | 1.59567000  | H | 0.57591100  | 3.84876900  | 2.55203900  |
| C                     | -2.20282300 | -3.08926200 | 0.62081900  | H | 1.54024800  | 5.10071700  | 1.75928100  |
| C                     | -2.21077900 | -1.37576200 | 2.28704200  | C | 1.75107600  | 2.91695500  | 0.21201900  |
| C                     | -3.54412400 | -2.84614700 | 0.34616800  | C | 1.95184600  | 1.87597400  | 1.12639500  |
| H                     | -1.67912100 | -3.85745100 | 0.05689600  | C | 2.71653800  | 3.08872100  | -0.78766400 |
| C                     | -3.55001700 | -1.11346500 | 2.01635400  | C | 3.06522300  | 1.04269900  | 1.06861300  |
| H                     | -1.69808300 | -0.78179600 | 3.04022700  | H | 1.20286900  | 1.68760100  | 1.89026300  |
| C                     | -4.24398300 | -1.84061800 | 1.03753800  | C | 3.83040200  | 2.25642300  | -0.87203000 |
| H                     | -4.04566600 | -3.44806300 | -0.40425600 | H | 2.60996700  | 3.87818000  | -1.52304700 |
|                       |             |             |             | C | 4.01052300  | 1.22726900  | 0.05505000  |
|                       |             |             |             | H | 3.15868800  | 0.23200200  | 1.78064800  |

|   |             |             |             |   |             |            |             |
|---|-------------|-------------|-------------|---|-------------|------------|-------------|
| H | 4.57389500  | 2.39141600  | -1.65172300 | H | 2.72558700  | 3.12552100 | -4.01753400 |
| O | 5.12347900  | 0.45244800  | -0.12183500 | H | 1.23797300  | 2.66528900 | -4.83561600 |
| C | 5.27197800  | -0.70368600 | 0.69340800  | C | 1.06838800  | 2.74532300 | -2.68375400 |
| H | 5.48399600  | -0.41476400 | 1.73418900  | H | 1.70670900  | 2.55298000 | -1.81383800 |
| H | 4.36134600  | -1.31138200 | 0.67113100  | C | 0.64845000  | 4.21669300 | -2.65568300 |
| O | -6.43258100 | -0.89380600 | -2.71095100 | H | 1.50823900  | 4.84672900 | -2.90348400 |
| H | -6.51945700 | -0.11232200 | -3.27835900 | H | -0.12993500 | 4.39894000 | -3.40651200 |
| C | 6.42527200  | -1.48700100 | 0.13512600  | O | 0.24557800  | 4.67377500 | -1.36493300 |
| C | 6.41790500  | -2.95543300 | 0.17034500  | C | -0.94135500 | 4.22043100 | -0.83394700 |
| O | 6.16267400  | -2.25133500 | -1.05267100 | C | -2.04285800 | 3.80725700 | -1.59215800 |
| H | 7.38214600  | -0.96469800 | 0.11392300  | C | -1.02139300 | 4.19269100 | 0.55601500  |
| H | 5.55675100  | -3.47320700 | 0.59133700  | C | -3.15689400 | 3.28500900 | -0.94775600 |
| H | 7.35982500  | -3.50080300 | 0.20432500  | H | -2.01272100 | 3.82295200 | -2.67363200 |

**DDMa-2THF-8H<sub>2</sub>O**

|   |            |             |             |   |             |             |             |
|---|------------|-------------|-------------|---|-------------|-------------|-------------|
| C | 5.58230500 | -1.52558900 | -0.13521400 | C | -3.22244100 | 3.16706000  | 0.44800200  |
| H | 5.98677500 | -2.47190300 | -0.51663800 | H | -3.97337700 | 2.90124500  | -1.55265500 |
| H | 6.44004300 | -0.91924000 | 0.17936100  | H | -2.14548300 | 3.60521400  | 2.26649000  |
| C | 4.68065200 | -1.78892700 | 1.06106500  | C | -4.39958300 | 2.41360000  | 1.07730000  |
| C | 4.84321900 | -1.11309000 | 2.27398200  | C | -4.25514800 | 2.29269500  | 2.60914900  |
| C | 3.59293300 | -2.66492000 | 0.94857600  | H | -5.08044200 | 1.69569500  | 3.00990300  |
| C | 3.94096200 | -1.27089200 | 3.32621000  | H | -3.31742100 | 1.80364900  | 2.88728000  |
| H | 5.68732100 | -0.43637000 | 2.39805300  | H | -4.28361600 | 3.27756300  | 3.08990800  |
| C | 2.68466900 | -2.82983700 | 1.98643100  | C | -5.69949100 | 3.19599800  | 0.78329100  |
| H | 3.42741100 | -3.21064000 | 0.02562700  | H | -5.92374800 | 3.22166000  | -0.28735000 |
| C | 2.82893300 | -2.12093100 | 3.19403000  | H | -6.56014600 | 2.76030700  | 1.30167300  |
| H | 4.07976100 | -0.72499600 | 4.25534200  | H | -5.59018300 | 4.22782600  | 1.13175900  |
| H | 1.83591200 | -3.49510100 | 1.85793200  | C | -4.44169600 | 0.98715900  | 0.49279500  |
| C | 4.82648000 | -0.82019500 | -1.24624200 | C | -3.25762700 | 0.32665900  | 0.13625700  |
| C | 4.79412100 | 0.57229600  | -1.34978200 | C | -5.64209600 | 0.28231900  | 0.33363900  |
| C | 4.03721600 | -1.54971900 | -2.14647400 | C | -3.25939400 | -0.97162500 | -0.37476200 |
| C | 3.97962100 | 1.22552900  | -2.27832000 | H | -2.30637300 | 0.83905800  | 0.21689200  |
| H | 5.41356800 | 1.17026900  | -0.68408800 | C | -5.66277900 | -1.01977400 | -0.16081400 |
| C | 3.21328000 | -0.91618300 | -3.06508100 | H | -6.58629500 | 0.74610100  | 0.59855700  |
| H | 4.03331400 | -2.63362400 | -2.10830700 | C | -4.47115200 | -1.65307500 | -0.52026100 |
| C | 3.15326800 | 0.48642800  | -3.14175800 | H | -2.32642900 | -1.42294900 | -0.68917100 |
| H | 3.99988400 | 2.30942300  | -2.33076700 | H | -6.59676600 | -1.56037700 | -0.27711000 |
| H | 2.60340100 | -1.51213300 | -3.73890700 | O | -4.59182100 | -2.92619200 | -1.02709100 |
| N | 2.32296800 | 1.07836700  | -4.09696700 | C | -3.50307600 | -3.82574900 | -0.87164700 |
| H | 1.61304300 | 0.44660600  | -4.44495400 | H | -2.83383300 | -3.52380000 | -0.06299300 |
| N | 1.91692400 | -2.27739900 | 4.23952000  | H | -3.93560400 | -4.79937900 | -0.60901800 |
| H | 1.69950300 | -1.39830900 | 4.70847100  | O | -0.06287500 | 1.87433800  | -2.62971800 |
| H | 1.06381200 | -2.74171000 | 3.94067700  | H | -0.19135900 | 1.60245600  | -1.68153900 |
| C | 1.86599200 | 2.44610400  | -3.96464400 | C | -2.69826000 | -4.01471400 | -2.13349000 |

|   |             |             |             |                         |             |             |             |
|---|-------------|-------------|-------------|-------------------------|-------------|-------------|-------------|
| C | -3.21789100 | -3.66837400 | -3.45830000 | H                       | 1.41852000  | -3.83976800 | -2.47839100 |
| O | -2.22828200 | -2.82406200 | -2.81547400 | H                       | 1.20404700  | -4.23768300 | -0.99346400 |
| H | -1.93726400 | -4.78780400 | -2.04601400 | O                       | -0.46568300 | -3.94441000 | -0.00672500 |
| H | -4.20128600 | -3.21209400 | -3.52986900 | H                       | -0.33016800 | -3.04012100 | -0.36816600 |
| H | -2.85655900 | -4.19583200 | -4.33875900 | H                       | -0.41295600 | -3.80346800 | 0.96308800  |
| O | 0.06941400  | 0.90286900  | -0.11997400 | O                       | 0.32399200  | -3.41230200 | -3.89093900 |
| H | 0.86708400  | 1.42478400  | 0.11965400  | H                       | -0.55170700 | -3.29870800 | -3.46712300 |
| H | 0.38685400  | -0.01253800 | -0.34801900 | H                       | 0.52409200  | -2.49496000 | -4.14572200 |
| O | -0.30254700 | -0.65377600 | -3.53188200 | O                       | -0.19505500 | 1.68926800  | 2.61386600  |
| H | -1.24421600 | -0.88718300 | -3.46642800 | H                       | -0.44432500 | 1.21892600  | 1.79252600  |
| H | -0.23180300 | 0.31212500  | -3.30769900 | H                       | 0.49628900  | 2.28780800  | 2.26981200  |
| O | 1.10206000  | 0.54815000  | 4.75627700  |                         |             |             |             |
| H | 0.59289100  | 0.87323000  | 3.97601900  |                         |             |             |             |
| H | 0.68257300  | 0.98029700  | 5.51402600  | <b>2 DGEBA / 1 MPDA</b> |             |             |             |
| O | 0.50064700  | -1.55564500 | -1.05962100 | C                       | 2.04417300  | -0.28179900 | -2.06834300 |
| H | 0.24489000  | -1.31926200 | -1.98430500 | C                       | 1.55058800  | 0.37807900  | -0.92674300 |
| H | 1.27966000  | -2.16216300 | -1.16763300 | C                       | 1.20085800  | -1.12617200 | -2.78259300 |
| C | 2.90235100  | 1.42349700  | 1.72632300  | C                       | 0.21613100  | 0.18344000  | -0.54531900 |
| O | 2.03504900  | 2.36658100  | 1.04702100  | C                       | -0.11940700 | -1.34193000 | -2.39878900 |
| C | 2.84135100  | 3.53666400  | 0.84121300  | H                       | 1.58383900  | -1.63248300 | -3.66595400 |
| C | 3.59299200  | 3.71543900  | 2.17053500  | C                       | -0.62814300 | -0.68141700 | -1.26333700 |
| C | 3.64942600  | 2.27593500  | 2.75949700  | H                       | -0.17497700 | 0.70621700  | 0.31452400  |
| H | 2.27528500  | 0.64676400  | 2.15812400  | H                       | -0.77032300 | -1.99532500 | -2.97267800 |
| H | 3.57067500  | 0.96921400  | 0.99053700  | N                       | -1.94263800 | -0.88639500 | -0.90051600 |
| H | 3.53729400  | 3.34284000  | 0.01297200  | H                       | -2.51073500 | -1.39977700 | -1.56012200 |
| H | 2.17418600  | 4.35210100  | 0.55888500  | C                       | -2.59319900 | -0.33638000 | 0.25934100  |
| H | 4.58515800  | 4.14829500  | 2.01450700  | H                       | -2.17662900 | 0.65160700  | 0.48350700  |
| H | 3.04027800  | 4.38594900  | 2.83550900  | H                       | -3.64136700 | -0.17332200 | 0.01885600  |
| H | 4.67244400  | 1.91984500  | 2.89957500  | C                       | -2.55253800 | -1.17979400 | 1.55008700  |
| H | 3.13842500  | 2.21699000  | 3.72401600  | H                       | -3.06789700 | -2.13205700 | 1.37848900  |
| C | -0.72660900 | -1.56307800 | 2.30915300  | C                       | -1.15003700 | -1.47096400 | 2.08030500  |
| O | -0.65376500 | -2.98066800 | 2.60333100  | H                       | -0.57034900 | -0.54032800 | 2.10545700  |
| C | -1.88943000 | -3.41197000 | 3.22107700  | H                       | -1.22542600 | -1.85310700 | 3.10738600  |
| C | -2.80095200 | -2.17954800 | 3.27347000  | O                       | -0.52880800 | -2.43309800 | 1.23976500  |
| C | -1.79674900 | -1.01967000 | 3.24536200  | C                       | 0.83241600  | -2.53305500 | 1.25114400  |
| H | 0.26716000  | -1.14719500 | 2.47030300  | C                       | 1.67199400  | -1.85563100 | 2.14261700  |
| H | -1.00439900 | -1.42775300 | 1.25997600  | C                       | 1.39632400  | -3.37597700 | 0.29127200  |
| H | -2.30760200 | -4.23304800 | 2.62861400  | C                       | 3.05123100  | -2.01844300 | 2.04612800  |
| H | -1.64865700 | -3.79131200 | 4.22076700  | H                       | 1.26645800  | -1.19719800 | 2.90146300  |
| H | -3.44086600 | -2.13241500 | 2.38565000  | C                       | 2.77588000  | -3.54533100 | 0.22847400  |
| H | -3.44456600 | -2.17786100 | 4.15773700  | H                       | 0.73781300  | -3.87062600 | -0.41439900 |
| H | -2.23916300 | -0.09274900 | 2.87756000  | C                       | 3.63616500  | -2.87265400 | 1.10486500  |
| H | -1.36321700 | -0.83045000 | 4.23342200  | H                       | 3.68734100  | -1.44863100 | 2.71735400  |
| O | 1.86256600  | -3.83593400 | -1.59795400 | H                       | 3.17737800  | -4.20710000 | -0.53091200 |
|   |             |             |             | C                       | 5.16771000  | -3.00240700 | 1.05926700  |

|   |             |             |             |   |             |             |             |
|---|-------------|-------------|-------------|---|-------------|-------------|-------------|
| C | 5.66847000  | -3.49647100 | 2.43182400  | C | -2.85417500 | 2.83094800  | 2.26026100  |
| H | 6.75772600  | -3.61854100 | 2.43367200  | C | -3.53177000 | 3.10981200  | -0.40807100 |
| H | 5.39981100  | -2.81367100 | 3.24271800  | H | -1.48323800 | 3.65184600  | -0.74202500 |
| H | 5.21712300  | -4.46829800 | 2.65496100  | C | -4.15561300 | 2.58583800  | 1.83226100  |
| C | 5.63764800  | -4.03220700 | 0.01051100  | H | -2.58290500 | 2.74482400  | 3.30821400  |
| H | 6.73088500  | -4.09066300 | 0.02118200  | C | -4.53128100 | 2.70838600  | 0.48300600  |
| H | 5.23940700  | -5.02865500 | 0.23315200  | H | -3.75365700 | 3.21681300  | -1.46304900 |
| H | 5.33186100  | -3.75891200 | -1.00315900 | H | -4.88592600 | 2.28743800  | 2.57580900  |
| C | 5.74692100  | -1.62960100 | 0.68340500  | C | -5.95602000 | 2.33320900  | 0.01376800  |
| C | 6.63980800  | -0.91088900 | 1.48660800  | C | -7.01148500 | 2.85561900  | 1.01497600  |
| C | 5.35225200  | -1.04210000 | -0.52314500 | H | -6.89349800 | 2.45536100  | 2.02354300  |
| C | 7.10079500  | 0.35012600  | 1.11046100  | H | -6.95193400 | 3.94690000  | 1.08481300  |
| H | 6.97960200  | -1.32219800 | 2.43091000  | H | -8.01468000 | 2.58342200  | 0.67102700  |
| C | 5.82070600  | 0.20333500  | -0.93027000 | C | -6.29228700 | 2.99892700  | -1.33444300 |
| H | 4.62512100  | -1.54879900 | -1.14969400 | H | -7.30648100 | 2.72339800  | -1.64039100 |
| C | 6.68569900  | 0.91734800  | -0.09583100 | H | -6.24580800 | 4.08830300  | -1.23563600 |
| H | 7.77854300  | 0.91115800  | 1.74637200  | H | -5.61781500 | 2.71324900  | -2.14409200 |
| H | 5.47492300  | 0.61752700  | -1.86720900 | C | -6.01326400 | 0.79363800  | -0.08999800 |
| O | 7.17387300  | 2.17767200  | -0.36354500 | C | -5.80164300 | 0.11852000  | -1.29700400 |
| C | 6.71027400  | 2.87211300  | -1.51191500 | C | -6.15238100 | 0.00080300  | 1.06098200  |
| H | 7.32317200  | 3.77856700  | -1.54083200 | C | -5.68615200 | -1.27386200 | -1.36448200 |
| H | 6.89031700  | 2.30229600  | -2.43438700 | H | -5.68327600 | 0.67245200  | -2.22072800 |
| O | -3.27845900 | -0.50371500 | 2.57694200  | C | -6.04245200 | -1.38120700 | 1.01747400  |
| H | -3.15845800 | 0.44960400  | 2.43212400  | H | -6.30521600 | 0.46137000  | 2.02950200  |
| C | 5.24659400  | 3.24981100  | -1.43336500 | C | -5.78079900 | -2.02812800 | -0.19368400 |
| C | 4.52319000  | 3.83082500  | -2.57414800 | H | -5.46889400 | -1.74043500 | -2.31671400 |
| O | 4.32058700  | 2.46186300  | -2.19830900 | H | -6.10553000 | -1.97287000 | 1.92398700  |
| H | 4.89698700  | 3.49146600  | -0.42894900 | O | -5.63008200 | -3.39094400 | -0.10951400 |
| H | 5.04210600  | 3.96712100  | -3.52296000 | C | -5.08067500 | -4.10730300 | -1.20723300 |
| H | 3.67275100  | 4.48152600  | -2.38724400 | H | -5.13819600 | -5.15436100 | -0.89476700 |
| H | 3.06879500  | -0.11659400 | -2.38294200 | H | -5.68301700 | -3.98459800 | -2.11811800 |
| N | 2.41823000  | 1.19091800  | -0.19288700 | O | 2.12761500  | 4.24755500  | -0.47281000 |
| H | 3.16450600  | 1.56770900  | -0.76771400 | H | 2.72169000  | 4.55657100  | 0.23145100  |
| C | 1.90484100  | 2.13962900  | 0.76846900  | C | -3.64284100 | -3.74123300 | -1.49791300 |
| H | 1.23245800  | 1.63261200  | 1.46605000  | C | -2.95621100 | -4.22636000 | -2.70164900 |
| H | 2.74792800  | 2.50762800  | 1.37218300  | O | -3.41086000 | -2.86735100 | -2.62413100 |
| C | 1.19195800  | 3.34584700  | 0.13588500  | H | -3.03337000 | -3.50236700 | -0.62596800 |
| H | 0.57345100  | 2.98221700  | -0.68784600 | H | -3.49263100 | -4.84371800 | -3.42201400 |
| C | 0.34509500  | 4.15643600  | 1.12532100  | H | -1.87539400 | -4.35613500 | -2.68161600 |
| H | 1.00368300  | 4.58251700  | 1.89313800  |   |             |             |             |
| H | -0.14494000 | 4.98574000  | 0.60181600  |   |             |             |             |
| O | -0.61042700 | 3.38743200  | 1.85450400  |   |             |             |             |
| C | -1.86678700 | 3.21174700  | 1.34129100  |   |             |             |             |
| C | -2.21851900 | 3.36460300  | -0.00021500 |   |             |             |             |
